# Supplementary material for: Hierarchical MFI type zeolites with intracrystalline macropores: the effect of the macropore size on the deactivation behaviour in the MTO reaction
Source: Royal Society of Chemistry journal article supplement (doi:10.1039/c9cy00368a), 2019-01-01
Supplement: c9cy00368a1.pdf [file c9cy00368a1.pdf]

## Hierarchical MFI type zeolites with intracrystalline macropores: the effect of the macropore size on the deactivation behaviour in the MTO reaction

Tobias Weissenberger,<sup>a</sup> Bastian Reiprich,<sup>a</sup> Albert G. F. Machoke,<sup>a</sup> Katharina Klühspies,<sup>a</sup> Jürgen Bauer,<sup>b</sup> Ralf Dotzel,<sup>b</sup> John L. Casci<sup>c</sup> and Wilhelm Schwieger,<sup>\*a</sup>

### Supplementary Information

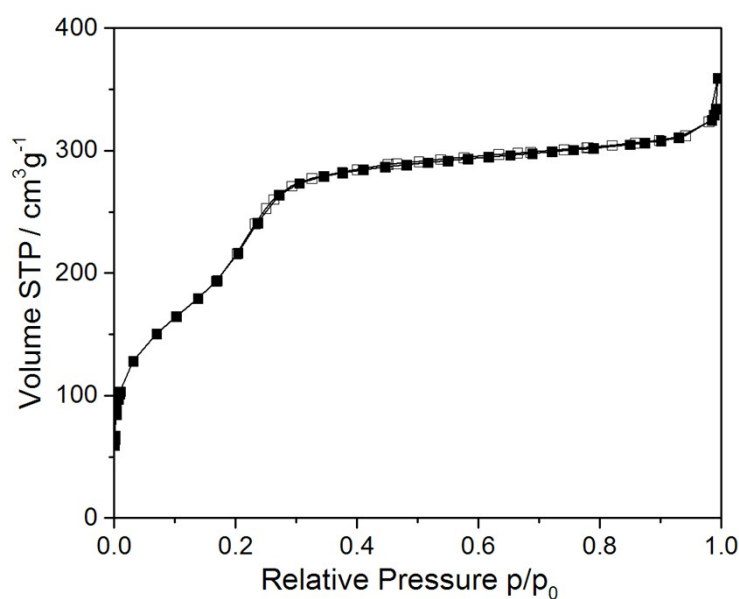

Figure 1: Nitrogen sorption isotherm of calcined MSPs synthesised at 293 K

Table 1: Nitrogen sorption data of calcined MSPs: <sup>a</sup> BET surface area, <sup>b</sup> total pore volume, <sup>c</sup> pore diameter determined by DFT

|              | $S_{\text{BET}}^{\text{a}}$<br>$\text{m}^2 \text{g}^{-1}$ | $V_{\text{total}}(p/p_0=0.993)^{\text{b}}$<br>$\text{cm}^3 \text{g}^{-1}$ | $d_{\text{Pores, DFT}}^{\text{c}}$<br>nm |
|--------------|-----------------------------------------------------------|---------------------------------------------------------------------------|------------------------------------------|
| MSPs (293 K) | 679                                                       | 0.500                                                                     | 3.179                                    |
| MSPs (318 K) | 677                                                       | 0.551                                                                     | 3.179                                    |
| MSPs (318 K) | 642                                                       | 0.566                                                                     | 3.179                                    |
| MSPs (323 K) | 661                                                       | 0.531                                                                     | 3.179                                    |

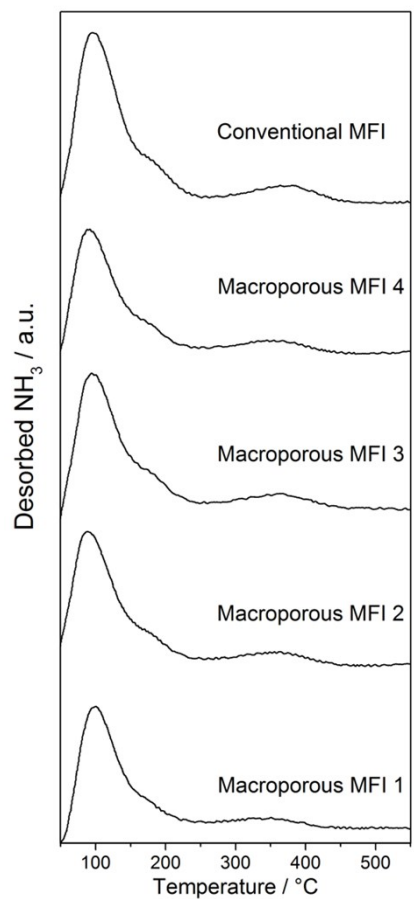

Figure 2: Ammonia TPD data of synthesised hierarchical and conventional ZSM-5 zeolites in H-form
